# Supplementary material for: N-heterocycle chelated oxomolybdenum(VI and V) complexes with bidentate citrate
Source: Royal Society of Chemistry journal article supplement (doi:10.1039/b717452g), 2008-01-01

# Supporting Information

## *N*-Heterocycle Chelated Oxomolybdenum(VI and V) Complexes with Bidentate Citrate

Zhao-Hui Zhou,\* Can-Yu Chen, Ze-Xing Cao, Khi-Rui Tsai, Yuan L. Chow

*State Key Laboratory for Physical Chemistry of Solid Surfaces and Department of Chemistry, College of Chemistry and Chemical Engineering, Xiamen University, Xiamen, 361005, China*

### **Experimental Section**

#### *Physical Measurements*

Infrared spectra were recorded as Nujol mulls between KBr plates with a Nicolet 360 FT-IR spectrometer. Electronic spectra in solution were recorded on a UV 2501 spectrophotometer. Elemental analyses were performed with an EA 1110 elemental analyzer. <sup>1</sup>H and <sup>13</sup>C NMR spectra were recorded in DMSO on a Bruker 400 NMR spectrometer using DSS (sodium 2,2-dimethyl-2-silapentane-5-sulfonate) as the internal reference.

## Figure Options

- Figure S1 UV-Vis spectra of  $[(\text{MoO}_2)_2\text{O}(\text{H}_2\text{cit})(\text{phen})(\text{H}_2\text{O})_2]\cdot\text{H}_2\text{O}$  (**1**) and  $[(\text{MoO})_2\text{O}(\text{H}_2\text{cit})_2(\text{bpy})_2]\cdot 4\text{H}_2\text{O}$  (**2**) in DMSO solution
- Figure S2 IR spectra of  $[(\text{MoO}_2)_2\text{O}(\text{H}_2\text{cit})(\text{phen})(\text{H}_2\text{O})_2]\cdot\text{H}_2\text{O}$  (**1**) and  $[(\text{MoO})_2\text{O}(\text{H}_2\text{cit})_2(\text{bpy})_2]\cdot 4\text{H}_2\text{O}$  (**2**)
- Figure S3 IR spectra of  $[\text{MoO}_2(\text{H}_2\text{cit})(\text{bpy})]\cdot\text{H}_2\text{O}$  (**6**)
- Figure S4 Calculated and experimental X-ray diffractogram of  $[(\text{MoO}_2)_2\text{O}(\text{H}_2\text{cit})(\text{phen})(\text{H}_2\text{O})_2]\cdot\text{H}_2\text{O}$  (**1**).
- Figure S5 The  $^{13}\text{C}$  NMR data of the solution of sodium molybdate(VI) and citric acid with the molar ratio Mo: cit = 1:1 at various pH values in equilibrium. \* denotes dimeric molybdenum citrate,  $\circ$  denotes monomeric molybdenum citrate, x denotes free citrate.

Figure S1

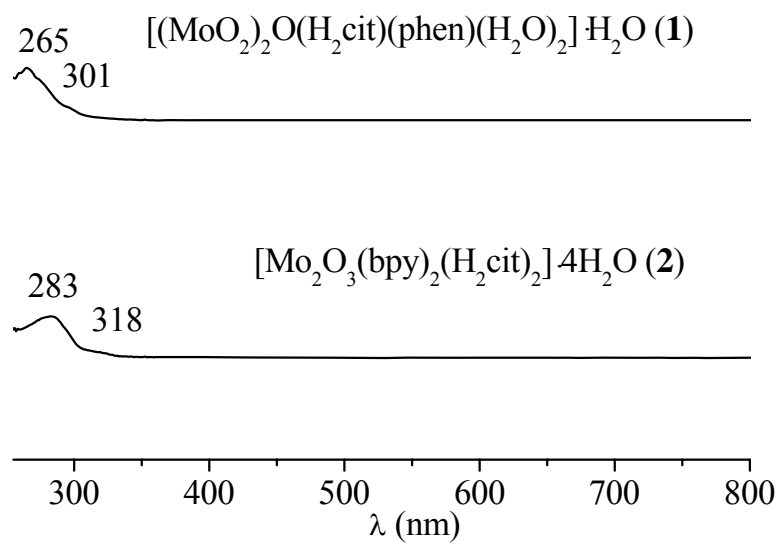

Figure S2

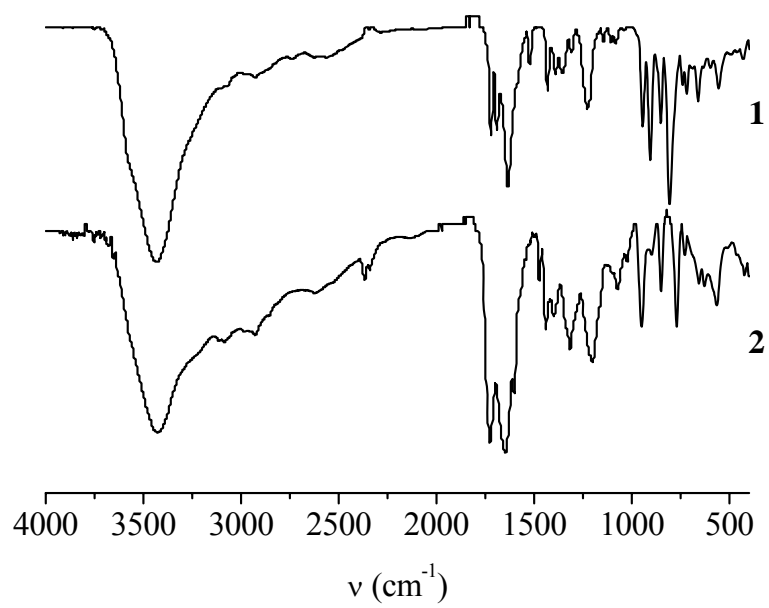

Figure S3

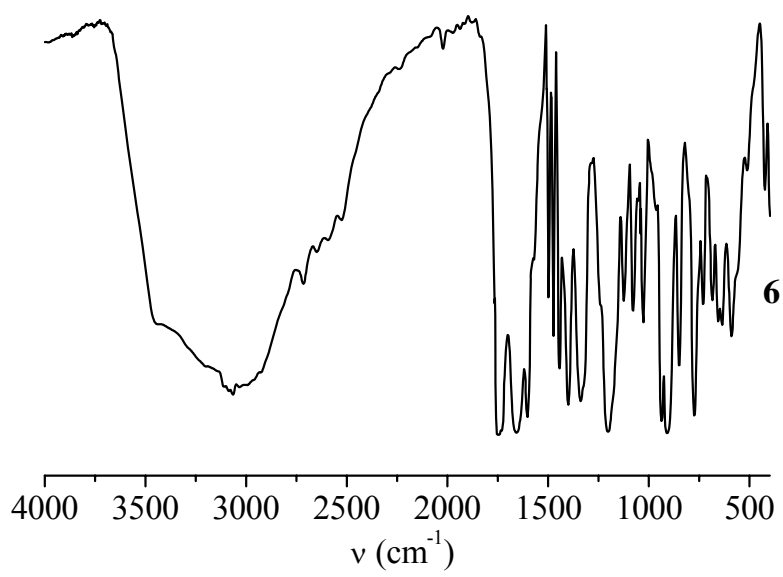

Figure S4

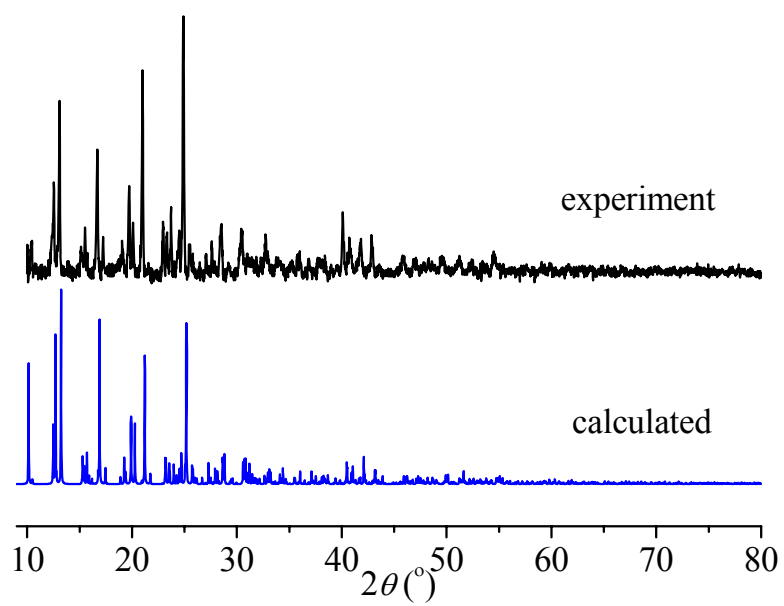

Figure S5

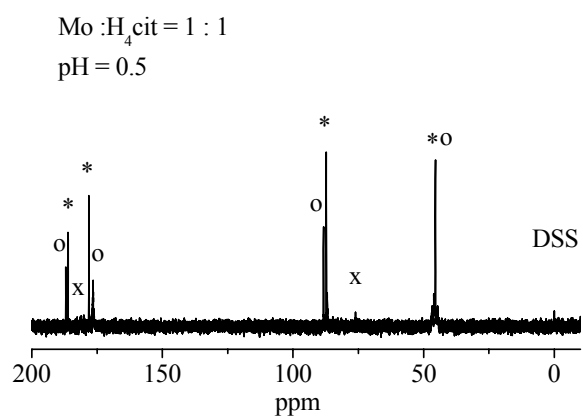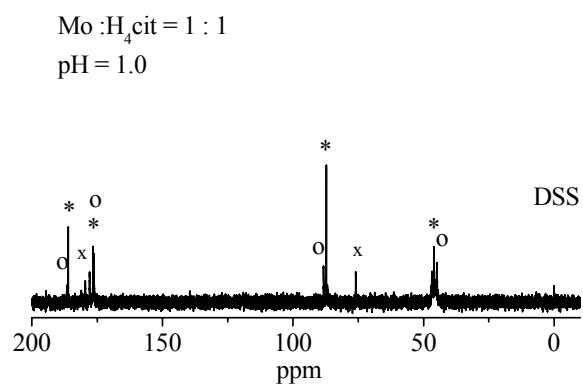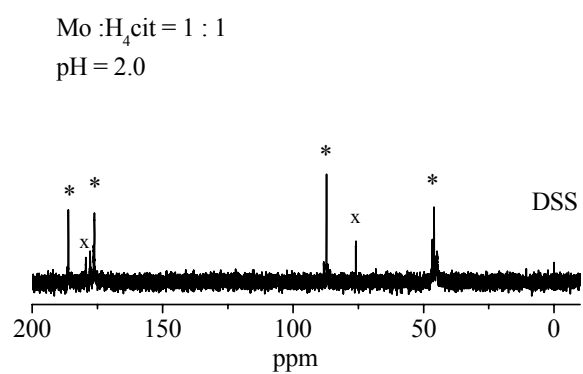

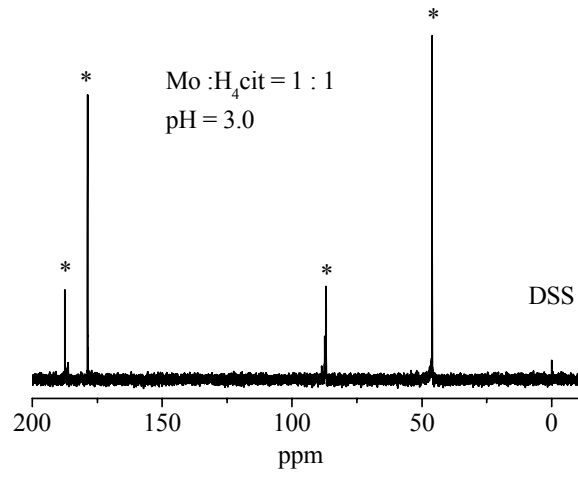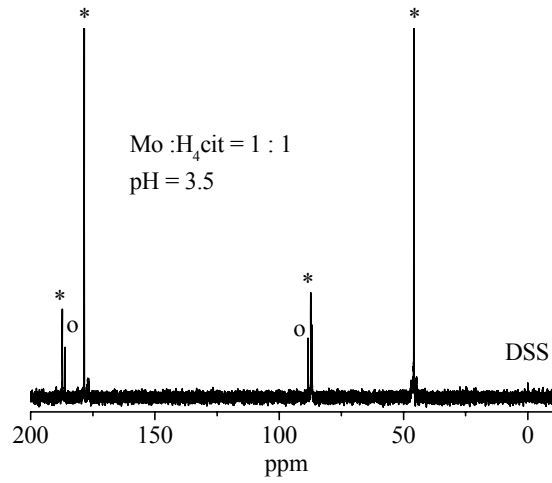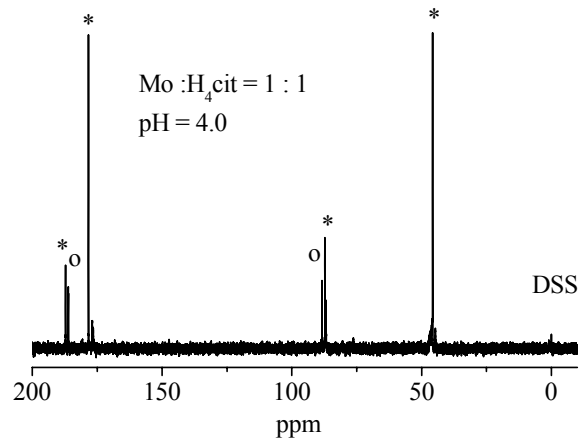

Supplement: b717452g.pdf [file b717452g.pdf]
